# Supplementary material
Source: ML conference proceedings conference paper supplement (https://openreview.net/forum?id=BimpCf1rT7)
Supplement: supplementary_material [file attachment]

## Supplementary Material for Compositional Diffusion-Based Continuous Constraint Solvers

Three videos are included in the supplementary directory:

1. `csp_solve_task1_triangle_packing.mp4` and `csp_solve_task4_robot_packing.mp4` are execution videos of solutions generated by our model Diffusion-CCSP.
2. `data_gen_task3_stability.mp4` shows the data generation simulation for task 3.

The appendix includes two sections. Appendix A discusses how to integrate Diffusion-CCSP for CCSP solving with task and motion planning (TAMP) algorithms. Appendix B details how our datasets are collected for each task and how the inputs are encoded for diffusion models. Appendix C includes further experiments on the number of samples it takes Diffusion-CCSP to solve problems in each task.

### A Integration with Task and Motion Planning Algorithms

So far, we have presented a generic solution to solving constraint satisfaction problems that involve geometric and physical constraints. However, assuming that the constraint graph is given as input to the algorithm. This approach can be directly used to solve particular tasks such as the pose prediction task in object rearrangements. Next, we illustrate how the proposed method can be integrated with a search algorithm to solve general task and motion planning (TAMP) problems, where the constraint graphs are automatically constructed based on the sequence of actions that has been applied and the goal specification of the task. For brevity, we will present a simplified formulation of TAMP problems. For more details, please refer to the recent survey [35].

Formally, given a space  $\mathcal{S}$  of world states, a problem is a tuple  $\langle \mathcal{S}, s_0, \mathcal{G}, \mathcal{A}, \mathcal{T} \rangle$ , where  $s_0 \in \mathcal{S}$  is the initial state (e.g., the geometry and poses of all objects),  $\mathcal{G} \subseteq \mathcal{S}$  is a goal specification (e.g., as a logical expression that can be evaluated based on a state:  $\text{in}(A, \text{Box})$  and  $\text{in}(B, \text{Box})$ ),  $\mathcal{A}$  is a set of continuously parameterized actions that the agent can execute (e.g., pick-and-place), and  $\mathcal{T}$  is a partial environmental transition model  $\mathcal{T} : \mathcal{S} \times \mathcal{A} \rightarrow \mathcal{S}$ . Each action  $a$  is parameterized by two functions: precondition  $\text{pre}_a$  and effect  $\text{eff}_a$ . The semantics of this parameterization is that:  $\forall s \in \mathcal{S}. \forall a \in \mathcal{A}. \text{pre}_a(s) \Rightarrow (\mathcal{T}(s, a) = \text{eff}_a(s))$ .

The goal of task and motion planning is to output a sequence of actions  $\bar{a}$  so that the terminal state  $s_T$  induced by applying  $a_i$  sequentially following  $\mathcal{T}$  satisfies  $s_T \in \mathcal{G}$ . The state space and action space are usually represented as STRIPS-like representations: the state is a collection of state variables and each action is parameterized by a set of arguments. Figure 6 shows a simplified definition of the pick-and-place action in a table-top manipulation domain.

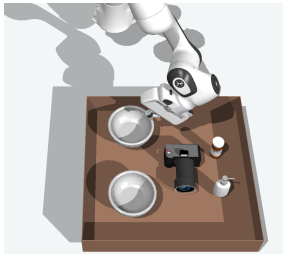

```
;; pick up x and place x to p.
action pick-place(x, g, p, t)
  pre: valid-grasp(x, pose[x], g)           ;; g is the grasp pose on x
       valid-traj(x, pose[x], g, p, t)      ;; p is the target pose of x
       forall z. cfree(x, z, pose[x], t)    ;; t is the robot trajectory
  eff: pose[x] := p                         ;; object x will be moved
```

```
goal: in(A, C, pose[A], pose[C]) and in(B, C, pose[B], pose[C])
```

The precondition-effect definition of a continuously parameterized action pick-place: pick and place object x.

Figure 6: **Illustration of a simple task and motion planning problem.** The domain contains only one action: pick-and-place of objects. It contains three preconditions:  $g$  should be a valid grasp pose on object  $x$ ,  $t$  should be a valid robot trajectory that moves  $x$  from its current pose to the target pose  $p$ , and during the movement, the robot and the object  $x$  should not collide with any other objects  $y$ . If successful, the object will be moved to the new location. The goal of the task is to pack both objects into the target box without any collisions.

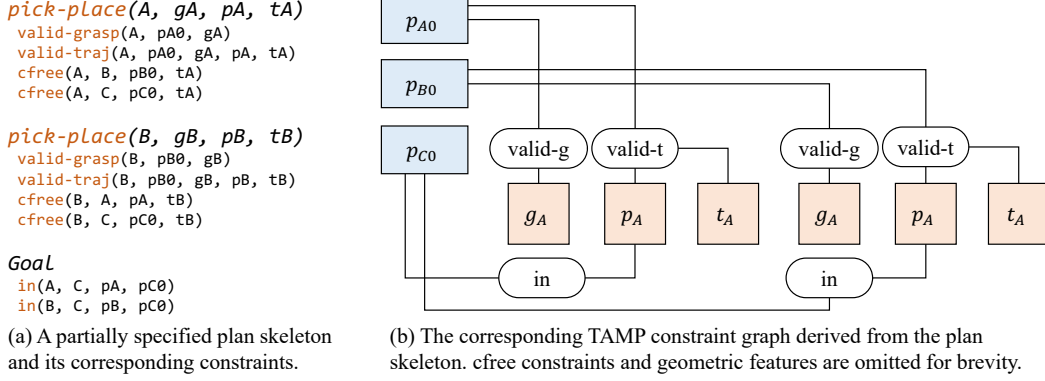

Figure 7: Example of a partially specified plan skeleton in task and motion planning, together with the corresponding set of constraints.  $p_{A0}$ ,  $p_{B0}$ , and  $p_{C0}$  corresponds to the initial pose of objects.

A characteristic feature of TAMP problems is that the decision variables (i.e., the arguments of actions) include both discrete variables (e.g., object names) and continuous variables (e.g., poses and trajectories). Therefore, one commonly used solution is to do a bi-level search [36, 4]: the algorithm first finds a plan that involves only discrete objects (called a *plan skeleton*) and uses a subsequent CSP solver to find assignments of continuous variables, backtracking to try a different high-level plan if the CCSP is found to be infeasible. For example, consider the discrete task plan (also called *plan skeleton*): *pick-and-place(A), pick-and-place(B)*. There are six parameters to decide: the grasps on A and B, the place locations of A and B, and the robot trajectory while transporting A and B. Based on the preconditions of actions and the goal condition of the task, we can obtain the constraint graph. Therefore, each solution to the CCSP constructed based on the plan skeleton corresponds to a concrete plan of the original planning problem. By combining the high-level search of plan skeletons and our constraint solver Diffusion-CCSP, the integrated algorithm is capable of solving a wide range of task and motion planning problems that involves geometric, physical, and qualitative constraints.

## B Problem Domains and Data Generation

Next, we describe how data are generated and how variables are encoded for each task. All datasets are balanced, i.e. the number the examples involving different number of objects are the same. In neural network input encoding, all object dimensions and poses are normalized with regard to that of the container or shelf region.

### B.1 2D Triangle Packing

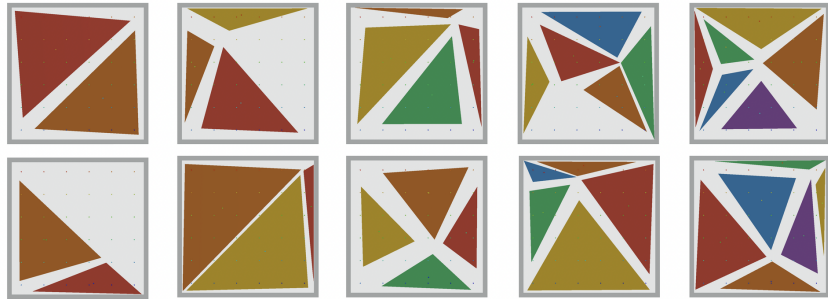

Figure 8: Example collision-free configurations of triangles

417 **Data.** The data is generated by randomly sampling points in the square and, connecting them with  
 418 each other and the edge points using the Bowyer–Watson algorithm, then shrinking each triangle a  
 419 little to make space among them.

420 **Encoding.** We define the resting pose of a triangle as the pose when the vertex  $A$  facing the shortest  
 421 side  $BC$  is at origin and its longest side  $AB$  is aligned horizontally. Its geometry is encoded three  
 422 numbers, the length of the longest side  $|AB|$  and the vector  $(x, y) = \overrightarrow{AC}$ . Its pose is encoded as the  
 423 2D coordinates of vertex  $A$ , along with the  $\sin$  and  $\cos$  values of the rotation  $\theta$  from the testing pose.

## 424 B.2 2D Shape Arrangement with Qualitative Constraints

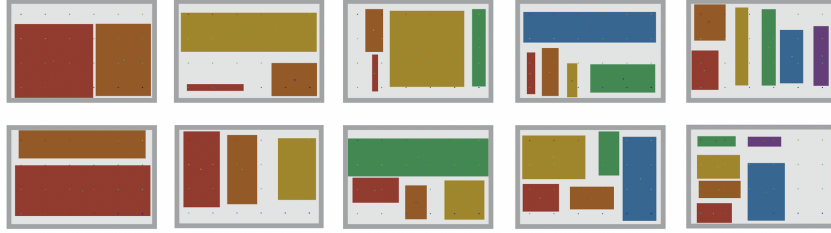

Figure 9: Example rearrangements of rectangles with in, cfree, and 11 types of qualitative constraints.

425 **Data.** The data is generated by recursively splitting the tray at different proportions until depth 3. For  
 426 each resulting region, a random padding is added to each side. Regions whose area or side is too small  
 427 are discarded. Labels of qualitative constraints are created by hand-crafted rules, e.g. ‘close-to’  
 428 means the distance between two objects is smaller than the maximum width of two objects. All qualita-  
 429 tive constraints include ‘center-in’, ‘left-in’, ‘right-in’, ‘top-in’, ‘bottom-in’,  
 430 ‘left-of’, ‘top-of’, ‘close-to’, ‘away-from’, ‘h-aligned’, ‘v-aligned’.

431 **Encoding.** The resting pose of a rectangle is when its longer side is oriented horizontally. Its geometry  
 432 is encoded using its width and length at resting pose. It’s pose is the 2D pose of the centroid, along  
 433 with the  $\sin$  and  $\cos$  encoding of the object’s  $yaw$  rotation. Many problems require some objects to  
 434 be at vertical positions in order for all the constraints to be satisfied.

## 435 B.3 3D Object Stacking with Stability Constraints

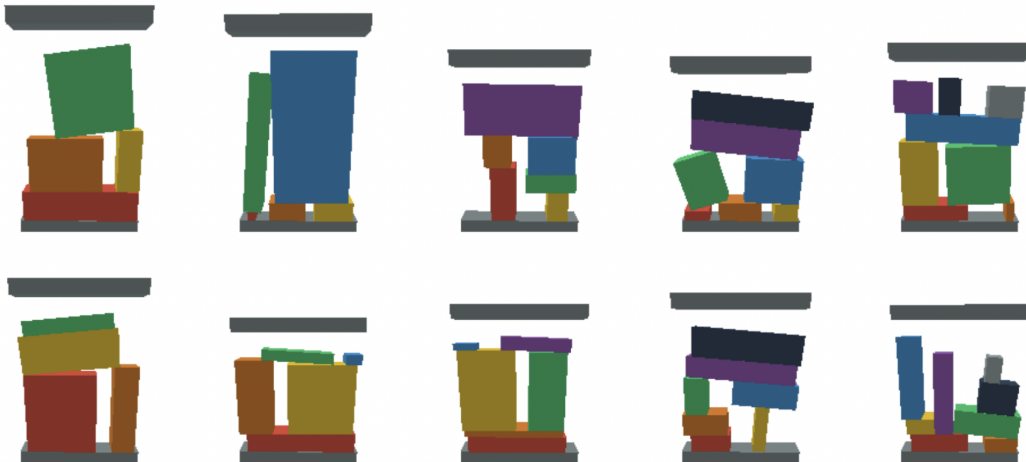

Figure 10: Example stable configurations of rectangles, with in, cfree, and supported-by constraints. There is at least one object that’s supported by multiple objects.

436 **Data.** The data is generated by randomly splitting a 2D vertical region and shrinking and cutting  
 437 each box. The resulting small boxes are initiated in PyBullet simulator and letting it drop until rest.  
 438 We filter for configurations where the final state is stable. Then all objects are removed one by one to  
 439 test that each intermediate configuration is also stable. An upper shelf is added to be just enough to  
 440 fit the current configuration.

441 **Encoding.** The resting pose of a box is rotated so that the longer side is oriented horizontally. The  
 442 rectangle’s geometry is encoded using its width and length. The rectangle’s pose is the 2D pose of  
 443 the centroid, along with the  $\sin$  and  $\cos$  encoding of the object’s  $roll$  rotation.

#### 444 B.4 3D Robot Packing with Robots

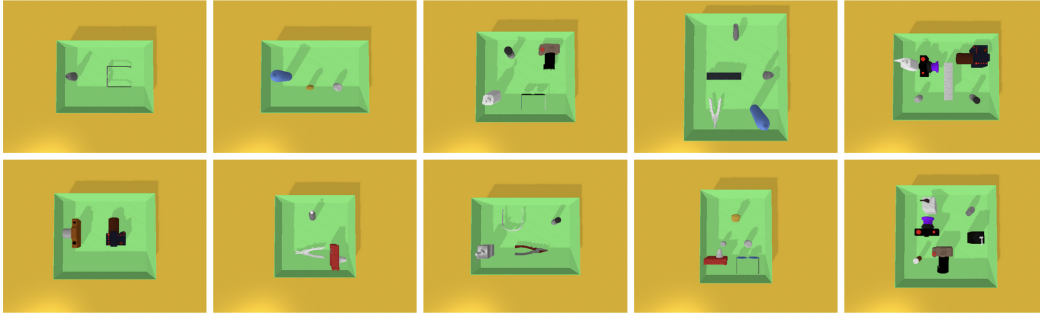

Figure 11: Example configuration of 3D shapes that enables the robot place each object in a given sequence without colliding into other objects already placed. All the bottles, dispensers, and bowls affords only side grasps.

445 **Data.** A fixed number of grasps are generated for each object that points directly to one of its five  
 446 faces, e.g.  $+x, -x, +y, -y, +z$ . The data is generated by randomly splitting the tray into rectangle  
 447 regions, then fitting into each region an object with random scale and orientation. The collision-free  
 448 configuration is then tested by a TAMP planner to see whether a placement order and corresponding  
 449 grasps can be found (by enumerating all combinations of order and grasps) so that the gripper at each  
 450 grasp pose won’t collide with any objects already in the goal region.

451 **Encoding.** The objects’ geometry is encoded using axis-aligned bounding box (e.g., width, length,  
 452 height). An object’s grasp is encoded using a five-dimensional vector, indicating the face that the  
 453 gripper points to. For example,  $[0, 0, 0, 0, 1]$  is a top grasp. The object’s pose is encoded using its 3D  
 454 coordinate in the tray frame, along with the  $\sin$  and  $\cos$  encoding of the object’s  $yaw$  rotation.

#### 455 C Additional Sampler Comparison

456 In the main experiment section, we let Diffusion-CCSP and baselines generate 10 samples for each  
 457 CCSP and check if all constraints are satisfied. Here we let Diffusion-CCSP generate 100 samples on  
 458 100 problems, and plot the number of problems it took Diffusion-CCSP to solve for each task. In a  
 459 batch of 100 CCSPs, it takes on average 0.01-0.05 sec for Diffusion-CCSP (Reverse) to solve each  
 460 CCSP while 0.18-0.28 for Diffusion-CCSP (ULA) to solve each CCSP.

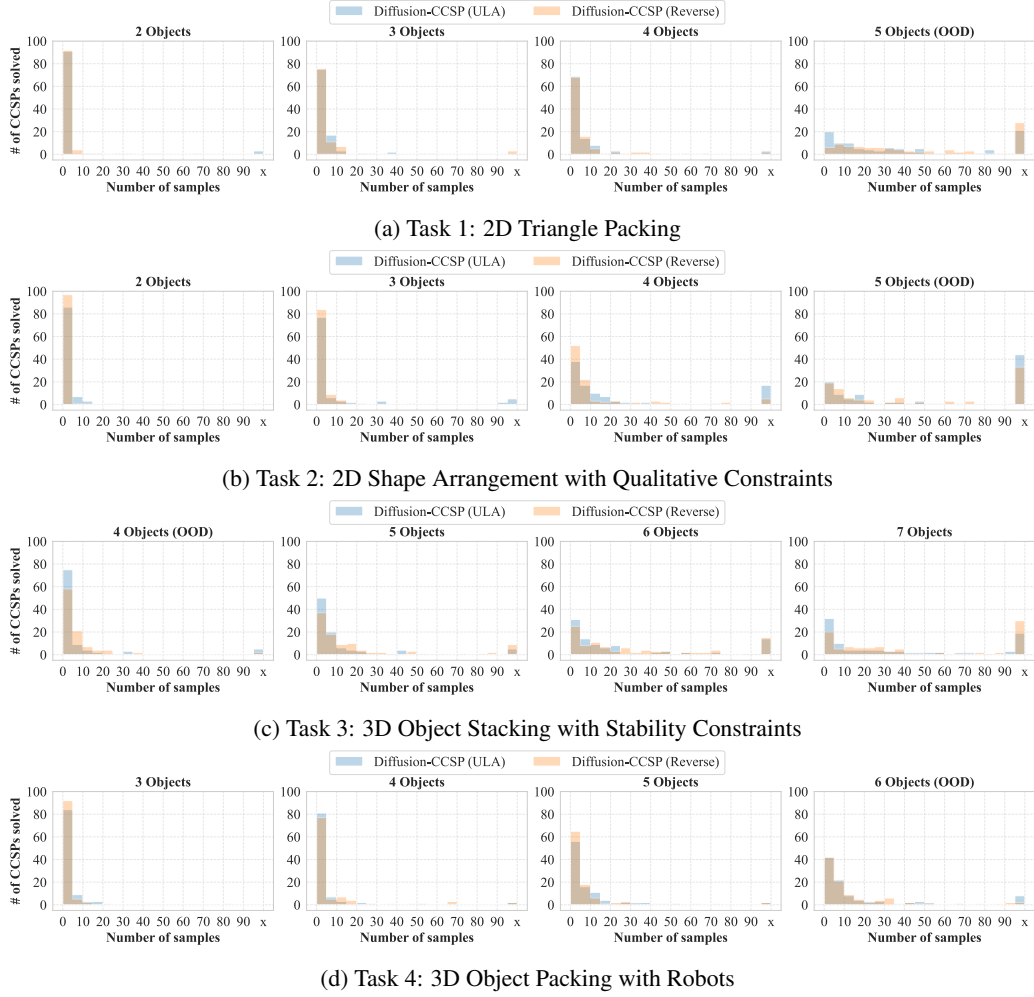

Figure 12: Number of Diffusion-CCSP runs it takes to solve 100 CCSPs. OOD means out-of-distribution problems that include more objects than trained on.  $x$  in  $x$  ticks means problems not solved within 100 runs.
